# Supplementary material
Source: PubMed Central journal article supplement (PMC3173079)

## SUPPLEMENTAL DATA

### **Roles of the Four DNA Polymerases of the Crenarchaeon *Sulfolobus solfataricus* and Accessory Proteins in DNA Replication**

Jeong-Yun Choi, Robert L. Eoff, Matthew G. Pence, Jian Wang, Martha V. Martin, Eun-Jin Kim, Lindsay M. Folkmann, and F. Peter Guengerich\*

*J. Biol. Chem.* **286**, 000-000 (2011)

#### TABLE OF CONTENTS

Table S1. **Oligonucleotides used in polymerase chain amplification for Dpo1, Dpo3, PCNA1, PCNA2, PCNA3, and RadA.**

Table S2. **Gene information and gene-specific primers used in RT-PCR.**

FIGURE S1. **RT-PCR analyses of Dpo1, Dpo2, Dpo3, and Dpo4.**

FIGURE S2. **Analysis of antibody cross-reactivity using immunoblotting.**

FIGURE S3. **Representative quantitative immunoblots (Dpo1, Dpo3, PCNA1, and RFC).**

Table S1. **Oligonucleotides used in polymerase chain amplification for Dpo1, Dpo3, PCNA1, PCNA2, PCNA3, and RadA.** All sequences are shown 5' to 3'.

**Dpo1**

|         |                                           |
|---------|-------------------------------------------|
| Dpo1_01 | GAATTAATTCGGATCCATGACCAAACAGCTGACTCT      |
| Dpo1_02 | CTTGGAGCTTGGGATGTCAAACAGAGTCAGCTGTTTGGTC  |
| Dpo1_03 | GACATCCCAAGCTCCAAGCCTGCCAAGTCTGAACAGAACA  |
| Dpo1_04 | CAGACTGTTGGGATTGTTGCGTGTCTGTTTCAGACTTGGC  |
| Dpo1_05 | CAACAATCCCAACAGTCTGCACCTGTGGAGGAAAAAAGG   |
| Dpo1_06 | CGAGCCATTACGACGCACCACCTTTTTTCTCCACAGG     |
| Dpo1_07 | CGTCGTGAATGGCTCGAGGAGGCGCAAGAGAATAAGATCT  |
| Dpo1_08 | GTCCACCTGCAGCAGGAAGTAGATCTTATTCTCTTGCGCC  |
| Dpo1_09 | CCTGCTGCAGGTGGACTATGACGGTAAGAAAGGTAAGGCT  |
| Dpo1_10 | CTTATCGAACAGCTTGCACACAGCCTTACCTTTCTTACCG  |
| Dpo1_11 | GTGCAAGCTGTTTCGATAAGGAAACCCAGAAAATCTATGCA |
| Dpo1_12 | GGCCGGTGTTCATAGAGTGCATAGATTTTCTGGGTTTC    |
| Dpo1_13 | CTCTATGATAACACCGGCCACAAACCTTACTTTCTGGTTG  |
| Dpo1_14 | ACCTTGTCGGTTCAGGTCAACCAGAAAGTAAGGTTTGT    |
| Dpo1_15 | TGGAACCGGACAAGGTTGGCAAGATCCCTAAGATTGTCCG  |
| Dpo1_16 | TATGATCGAAGCTCGGATCACGGACAATCTTAGGGATCTT  |
| Dpo1_17 | GATCCGAGCTTCGATCATATCGAGACGGTGTCTAAGATCG  |
| Dpo1_18 | ACTTATTCCACGTGTAAGGGTTCGATCTTAGACACCGTCTC |
| Dpo1_19 | CCCTTACACGTGGAATAAGTTCAAGCTCACCAAATCGTT   |
| Dpo1_20 | GACCGCCAGCGGATCGCGAACAACGATTTTGGTGAGCTTG  |
| Dpo1_21 | ATCCGCTGGCGGTCCGCCGTCTGCGTAACGATGTGCCGAA  |
| Dpo1_22 | ATTTGATGTGGGCCTCGTATGCTTTCGGCACATCGTTACG  |
| Dpo1_23 | CGAGGCCACATCAAATACTTTAACAACACTACATGTACGAC |
| Dpo1_24 | ACCAGGGATCAGACCGATGTCGTACATGTAGTTGTTAAAG  |
| Dpo1_25 | CGGTCTGATCCCTGGTATGCCTTACGTTGTAAGAACGGC   |
| Dpo1_26 | CAGGTATACAGATTTCGAGTTTGCCGTTCTTTACAACGTAA |
| Dpo1_27 | AAACTCGAATCTGTATACCTGTCTCTGGACGAAAAGGACG  |
| Dpo1_28 | AACGCCTTTTTGATCTCTTCGACGTCCTTTTCGTCCAGAG  |
| Dpo1_29 | GAAGAGATCAAAAAGGCGTTCGCAGACTCTGATGAGATGA  |
| Dpo1_30 | AGTCAACGGCCATCTGACGAGTCATCTCATCAGAGTCTGC  |
| Dpo1_31 | TCAGATGGCCGTTGACTGGCTGCCGATCTTCGAAACCGAA  |
| Dpo1_32 | CAACGCGCTTGATCTTTGGAATTTGCGTTTTCGAAGATCGG |
| Dpo1_33 | CAAAGATCAAGCGCGTTGCAATTGACATTGAAGTCTACAC  |
| Dpo1_34 | ATGCGGCCCTTTACCGGAGTGTAGACTTCAATGTCAATTG  |
| Dpo1_35 | CGGTAAAGGGCCGCATTCCGGATTCTCAGAAAGCAGAATT  |
| Dpo1_36 | CGCGATGCTAATGATAGGAAATTCTGCTTTCTGAGAATCC  |
| Dpo1_37 | TCCTATCATTAGCATCGCGCTCGCGGGTTCCGACGGCCTG  |
| Dpo1_38 | TACGATTCAGAACGAGGACTTTCTTCAGGCGGTCCGAACC  |
| Dpo1_39 | GTCTCGTTCTGAATCGTAATGACGTAACGAGGGCTCTG    |
| Dpo1_40 | GACAGAAATACCGTCCAGTTTAAACAGAGCCCTCGTTTACG |
| Dpo1_41 | ACTGGACGGTATTTCTGTTCGAGCGTTTCAATACTGAGTAC |
| Dpo1_42 | AGAAACGGCCGAGCAGCTCGTACTCAGTATTGAAACGCTC  |
| Dpo1_43 | TGCTCGGCCGTTTCTTCGATATTCTCCTGGAGTACCCGAT  |

|         |  |                                            |
|---------|--|--------------------------------------------|
| Dpo1_44 |  | CGTCACCGTTAAAGGTGAGCACGATCGGGTACTCCAGGAG   |
| Dpo1_45 |  | TCACCTTTAACGGTGACGACTTCGACCTGCCGTATATCTA   |
| Dpo1_46 |  | CCCAGTTTCAGCGCACGGAAATAGATATACGGCAGGTCTGA  |
| Dpo1_47 |  | GTGCGCTGAAACTGGGTTATTTCCAGAGGAGATCCCGAT    |
| Dpo1_48 |  | CCTCATCTTTACCAGCGACATCAATCGGGATCTCCTCTGG   |
| Dpo1_49 |  | TCGCTGGTAAAGATGAGGCCAAATACCTCGCAGGTCTCCA   |
| Dpo1_50 |  | AAAAAGAACTTGTACAGATCAATGTGGAGACCTGCGAGGT   |
| Dpo1_51 |  | ATTGATCTGTACAAGTTCTTTTTCAACAAAGCGGTTTCGCA  |
| Dpo1_52 |  | TATACTTGCCCTCGAATGCGTAGTTGCCAACCCTTTGTT    |
| Dpo1_53 |  | GCATTTCGAGGGCAAGTATAACGAGTACAACCTCGACGCGAG |
| Dpo1_54 |  | GGTACCCAGCAGCGCTTTAGCCACTGCGTCGAGGTTGTAC   |
| Dpo1_55 |  | GCGCTGCTGGGTACCTCTAAAGTGAAAGTGGACACGCTGA   |
| Dpo1_56 |  | TTTCTCAACATCGAGGAAAGAAATCAGCGGTGCCACTTTC   |
| Dpo1_57 |  | CTTTCCTCGATGTTGAGAACTCATCGAATACAACCTCCG    |
| Dpo1_58 |  | GGAGAGTAATTTCCGCGTCACGGAAGTTGTATTTCGATGAG  |
| Dpo1_59 |  | ACGCGGAAATTACTCTCCAACCTGACGACGTTCAATAATGA  |
| Dpo1_60 |  | CAATCAGCTTCATAGTGAGGTCATTATTGAACGTCGTCAG   |
| Dpo1_61 |  | CCTCACTATGAAGCTGATTGTGCTGTTTTCTCGCATCTCT   |
| Dpo1_62 |  | CAGTTCCTCAATACCCAGGCGAGAGATGCGAGAAAACAGC   |
| Dpo1_63 |  | CCTGGGTATTGAGGAACTGACCCGCACCGAGATTTCTACT   |
| Dpo1_64 |  | AGTAATAGAGATTTTTGACCCAAGTAGAAATCTCGGTGCG   |
| Dpo1_65 |  | TGGGTCAAAAATCTCTATTACTGGGAACACCGCAAACGTA   |
| Dpo1_66 |  | CTCTTTGAGAGGAATGAGCCAATTACGTTTGCGGTGTTCC   |
| Dpo1_67 |  | GCTCATTCTCTCAAAGAGGAAATCCTCGCTAAATCTAGC    |
| Dpo1_68 |  | GAGCAGACGTGCGGATATTGCTAGATTTAGCGAGGATTTTC  |
| Dpo1_69 |  | TCCGCACGTCTGCTCTGATTAAAGGCAAAGGCTACAAAGG   |
| Dpo1_70 |  | TGGAGGGTCAATGACGACCGCACCTTTGTAGCCTTTGCCT   |
| Dpo1_71 |  | TCGTCATTGACCCTCCAGCCGGCATCTTCTTCAATATTAC   |
| Dpo1_72 |  | GATGCGAAATCGAGCACCGTAATATTGAAGAAGATGCCGG   |
| Dpo1_73 |  | GGTGCTCGATTTTCGCATCCCTGTACCCGTCTATCATCCGT  |
| Dpo1_74 |  | GTCTCATAGCTGAGGTTCCAAGTACGGATGATAGACGGGT   |
| Dpo1_75 |  | GGAACCTCAGCTATGAGACTGTGGACATCCAGCAGTGCAA   |
| Dpo1_76 |  | CATCCTTAACTTCATATGGTTTTTTGCACTGCTGGATGTC   |
| Dpo1_77 |  | AAAACCATATGAAGTTAAGGATGAAACGGGTGAAGTGCTG   |
| Dpo1_78 |  | GGACGGTCCATGCAGACAATATGCAGCACTTCACCCGTTT   |
| Dpo1_79 |  | TCTGCATGGACCGTCTTGGCATCACCGCTGTCATCACTGG   |
| Dpo1_80 |  | TTACACGAAAATCACGCAGGAGGCCAGTGATGACAGCGG    |
| Dpo1_81 |  | GCGTGATTTTCGTGTGAAGATTTACAAGAAGAAGGCGAAG   |
| Dpo1_82 |  | CCTCGGAGTTATTTGGGTTCTTCGCCTTCTTCTTGTAAT    |
| Dpo1_83 |  | AACCCAAATAACTCCGAGGAGCAAAAACCTGCTCTACGACG  |
| Dpo1_84 |  | CTTTCATCGCACGCTGCACTACGTCGTAGAGCAGTTTTTG   |
| Dpo1_85 |  | CAGCGTGCGATGAAAGTTTTTCATCAATGCGACCTATGGTG  |
| Dpo1_86 |  | GGAAAAGTTTTCCGCACCAAAGACACCATAGGTGCGATTGA  |
| Dpo1_87 |  | TGGTGCGGAAACTTTTCCACTGTATGCTCCGGCAGTCGCG   |
| Dpo1_88 |  | TAGCGACCCAGCGCGGTAACGGATTCCGCGACTGCCGGAG   |
| Dpo1_89 |  | GCGCTGGGTGCTATGTGATTACCTCCACGGTAAAAAAG     |
| Dpo1_90 |  | ACGGTCAGGCCTTCTCGCGCGCTTTTTTACCCTGGAGG     |
| Dpo1_91 |  | GGAAGGCTGACCGTGCTGTACGGTGATACGGACTCCCTG    |

|          |                                           |
|----------|-------------------------------------------|
| Dpo1_92  | TTTTCGGCGGATTTCAGCAGAAACAGGGAGTCCGTATCACC |
| Dpo1_93  | GCTGAATCCGCCGAAAAATTCCCTCGAGAACATTATCAAG  |
| Dpo1_94  | TTGAAGGTCGTCTTAACCCACTTGATAATGTTCTCGAGGG  |
| Dpo1_95  | GGGTAAAGACGACCTTCAATCTGGATCTCGAAGTTGACAA  |
| Dpo1_96  | AACGCCACGAATTTGTAAGTCTTGTCAACTTCGAGATCCA  |
| Dpo1_97  | CTTACAAATTCGTGGCGTTTTCCGGTCTCAAAAAAACTA   |
| Dpo1_98  | GTCTTGGTACACACCGAAGTAGTTTTTTTTGAGACCGGAA  |
| Dpo1_99  | TTCCGGTGTGTACCAAGACGGCAAGGTAGACATTAAGGGCA |
| Dpo1_100 | GTTACGCTTCTTAACGAGCATGCCCTTAATGTCTACCTTG  |
| Dpo1_101 | GCTCGTTAAGAAGCGTAACACGCCGGAGTTCGTCAAGAAG  |
| Dpo1_102 | GTTCTTGACCTCGTTGAACACCTTCTTGACGAACTCCGG   |
| Dpo1_103 | TCAACGAGGTCAAGGAACTCATGATCTCCATCAATAGCCC  |
| Dpo1_104 | TTAATCTCTTTCACGTCGTTTGGGCTATTGATGGAGATCA  |
| Dpo1_105 | AAACGACGTGAAAGAGATTAACGCAAATTGTTGACGTG    |
| Dpo1_106 | GCTTCTCGTAAGAACCTTTCACCACGTCAACAATTTTGGC  |
| Dpo1_107 | GAAAGGTTCTTACGAGAAGCTCAAGAACAAGGGCTATAAC  |
| Dpo1_108 | TTAAATGCCAGTTCATCCAGGTTATAGCCCTTGTTCTTGA  |
| Dpo1_109 | CTGGATGAACTGGCATTAAAGGTTATGCTCTCTAAACCGC  |
| Dpo1_110 | TGTTTTTCTTATAGGCGTCCAGCGGTTTAGAGAGCATAAC  |
| Dpo1_111 | GGACGCCTATAAGAAAAACACCCCGCAACACGTGAAGGGC  |
| Dpo1_112 | GCCGAATGGGCGGAGCTGGAGTGCCGCCTTACGTGTTGC   |
| Dpo1_113 | TCCGCCCATTCGGCGTCAACGTTCTGCCGCGTGACATCAT  |
| Dpo1_114 | TTGCTACGCACTTTTACATAGTAGATGATGTCACGCGGCA  |
| Dpo1_115 | CTATGTAAGAGTGCCTAGCAAGGATGGCGTGAAACCTGTC  |
| Dpo1_116 | ATTTACAGTAACTTTGGCGAGTTGGACAGGTTTACGCCAT  |
| Dpo1_117 | CTCGCCAAAGTTACTGAAATTGACGCAGAAAAGTATCTGG  |
| Dpo1_118 | CGAAAGTAGAGCGGAGAGCCTCCAGATACTTTTCTGCGTC  |
| Dpo1_119 | CTCTCCGCTCTACTTTTCGAGCAGATCCTCCGCGCGTTTGG |
| Dpo1_120 | TCGCGGCGATCTCGTCCCAGGACACACCAAACGCGCGGAG  |
| Dpo1_121 | CGAGATCGCCGCGACCATGTCTATCGACAGCTTTTTCTCC  |
| Dpo1_122 | GAGTTACCCTTGAAGGGTAGGAGAAAAAGCTGTGATGATG  |
| Dpo1_123 | CCCTTCCAAGGGTAACCTCTACCATCATCACCACCACTGA  |
| Dpo1_124 | GACGGAGCTCGAATTCTCAGTGGTGGTATGATG         |

### Dpo3

|         |                                               |
|---------|-----------------------------------------------|
| Dpo3_01 | GAATTAATTCGGATCCATGATTAAGACTTCTTTATC          |
| Dpo3_02 | ATCTCGTAGGAGAAGTCGAGGATAAAGAAGTCTTTAATCATGGAT |
| Dpo3_03 | TCGACTTCTCCTACGAGATTAAGGGTAACACCCCGCTGGTATACA |
| Dpo3_04 | GAGTTGCCCTCGTCATCCACGGACCAGATGTATACCAGCGGGGTG |
| Dpo3_05 | GATGACGAGGGCAACTCCTCTGTAGTGATCGACAACAACTTCCGT |
| Dpo3_06 | GCCTTCGTAGATGATGTAGAAGTACGGACGGAAGTTGTTGTCGAT |
| Dpo3_07 | TCTACATCATCTACGAAGGCAACGAGAACGAGATCATTGAGAACA |
| Dpo3_08 | TGCAGCGCTTCGCAATTCTTTTTGATGTTCTCAATGATCTCGTTC |
| Dpo3_09 | TGCGAAGCGCTGCAAATCACCAAAGTAAAACGTAAATACCTGGGT |
| Dpo3_10 | GATGAGCAGGGCGTCCACGATGTTACCCAGGTATTTACGTTTTAC |
| Dpo3_11 | GGACGCCCTGCTCATCCAGACGTCTACCCCGACTCAGATCAAGAA |
| Dpo3_12 | TTGAGTTCAGAGATTTTCTCGCGGCACTTCTTGATCTGAGTCGGG |
| Dpo3_13 | CGAGAAAATCTCTGAACTCAACAACATCAAGGGCATCTTCGACGC |

|         |  |                                                |
|---------|--|------------------------------------------------|
| Dpo3_14 |  | AGGGAGTAACGCATGGTGTAACGGATGTCCGCGTCGAAGATGCC   |
| Dpo3_15 |  | ACCATGCGTTACTCCCTGGATTTTCGACCTGCGTCCGTTACGTGG  |
| Dpo3_16 |  | GAACTTCACCTCGTTCACTTCAGCGCGGAACCACGTGAACGGACG  |
| Dpo3_17 |  | AGTGAACGAGGTGAAGTTTCGACGGTTTCCGCACTAAAAAGGCGTA |
| Dpo3_18 |  | TAATGGGACAGGATCTTGTGCGAGGATGTACGCCTTTTTAGTGCGG |
| Dpo3_19 |  | GACAAGATCCTGTCCCATTATGAGGGTAATATGCCAGAACTCCGT  |
| Dpo3_20 |  | TAGATCTGGAAGTCCACACCAATCGTACGGAGTTCTGGCATATTA  |
| Dpo3_21 |  | GTGTGGACTTCCAGATCTACTCTAAATACGGTTCCTCAACCCGC   |
| Dpo3_22 |  | ACAGGCTCATGACGACGATCGGGTCTTTGCGCGGGTTGAGGGAAC  |
| Dpo3_23 |  | GTCGTCATGAGCCTGTGGTCTAAGGAAGGCCCGATGCAGTTTAGC  |
| Dpo3_24 |  | ATCTTGAGGTCGTCAATGCCTTCGTCCAGGCTAAACTGCATCGGG  |
| Dpo3_25 |  | GCATTGACGACCTCAAGATTATCCGCCGTTTCGTTGATTATATCC  |
| Dpo3_26 |  | AAAATGATGTCCGGGTCGTAGTTCAGGATATAATCAACGAAACGG  |
| Dpo3_27 |  | CGACCCGGACATCATTTTCGTCTACGACAGCGACCTCCTGCCGTG  |
| Dpo3_28 |  | AGAGAAGACGCACGCTCCGTGATATACTTCCACGGCAGGAGGTGG  |
| Dpo3_29 |  | AGCGTGCCTTCTCTCGGCGTAAAATTGACATTGGTCGTAAGA     |
| Dpo3_30 |  | TGCCTACAGAAACCTCGCTGCCGATCTTACGACCAATGTCAATTT  |
| Dpo3_31 |  | GCGAGGTTTCTGTAGGCACTTACGGCCACTACTCCATCAGCGGCC  |
| Dpo3_32 |  | CGAGCAGACCCGTGAGGTCGACGTTGAGACGGCCGCTGATGGAGT  |
| Dpo3_33 |  | TCACGGGTCTGCTCGTGAATGAGCGTTCTCTGGGCCACGTGGATC  |
| Dpo3_34 |  | AGATGCCGAGGTAATTGAAACGTCAATCAGATCCACGTGGCCCA   |
| Dpo3_35 |  | CCAATTACCTCGGCATCTCTCCGAGCCGCTATTCCTTCAAGTGGT  |
| Dpo3_36 |  | GTTGTCCCAGTAGCGGGAGATTTTCGTACCACTTGAAGGAATAGCG |
| Dpo3_37 |  | CCGCTACTGGGACAACGAGAAGAACCCTCGTATCATCCGTGAATA  |
| Dpo3_38 |  | GATGGAGCGCGCATTCTCGATAGAGTATTCACGGATGATACGACG  |
| Dpo3_39 |  | GAATGCGCGCTCCATCTACCTCCTGGGCAACTACCTGCTCTCCAC  |
| Dpo3_40 |  | CCCACGATCTTACCAGCTCGGAATAGGTGGAGAGCAGGTAGTTG   |
| Dpo3_41 |  | CTGGTGAAGATCGTGGGCCTCCCTCTCGACAAGCTCAGCGTAGCT  |
| Dpo3_42 |  | GGCTGGTTTCAATGCGATTACCCCAAGAAGCTACGCTGAGCTTGT  |
| Dpo3_43 |  | TCGCATTGAAACCAGCCTCATCCGCACCGCGACTAAATCCGGCGA  |
| Dpo3_44 |  | TCGGATTGTCCATGCGGATCGGAATCAGCTCGCCGGATTTAGTCG  |
| Dpo3_45 |  | CGCATGGACAATCCGAACCGCCCGAGCAAATCAAAAAAACATC    |
| Dpo3_46 |  | TACCGACCTTCGGCTGGATGATGATGTTTTTTTTGATTTTGCTCG  |
| Dpo3_47 |  | CAGCCGAAGGTCGGTATCTACACTGATGTCTATGTGCTCGACATT  |
| Dpo3_48 |  | CGAATGACCAGGCTGTAACAGAGCTAATGTGCGAGCATAGACA    |
| Dpo3_49 |  | TTACAGCCTGGTCATTTCGCAAATTCATATCGCTCCGGATACCCT  |
| Dpo3_50 |  | AGTAGCAGTCATCACACTGTTCTTAACCAGGGTATCCGGAGCGA   |
| Dpo3_51 |  | CAGTGTGATGACTGCTACTCCTCCCTATCAGCAACTATAAGTTC   |
| Dpo3_52 |  | TAGAGACCAGACGGCTCACGCTTGAACCTTAGTTGCTGATAGGG   |
| Dpo3_53 |  | GAGCCGTCTGGTCTTACAAAACCTTTCTCGATGAACTGTCTAAC   |
| Dpo3_54 |  | CTTAATCTTGTTAGAGTCGCGTACGTTAGACAGTTCATCGAGAAA  |
| Dpo3_55 |  | CGCGACTCTAACAAGATTAAGGTCATCGAAGAGCTCATCTCCTCT  |
| Dpo3_56 |  | TTCACCCAATGTACGTAGTCGTTAAAAGAGGAGATGAGCTCTTCG  |
| Dpo3_57 |  | ACTACGTACATTGGGTGAACGCCCGTTGGTACAGCCGTGAGATCG  |
| Dpo3_58 |  | TCATTGGAGAACTCGTCGAAGGCGGATGCGATCTCACGGCTGTAC  |
| Dpo3_59 |  | CGACGAGTTCTCCAATGAAATCATCCGCTTCATCATTGACCTCAT  |
| Dpo3_60 |  | GGATCACGTCCAGACCGCTGGACTTGATGAGGTCAATGATGAAGC  |

|         |  |                                                |
|---------|--|------------------------------------------------|
| Dpo3_61 |  | GGTCTGGACGTGATCCTGGCGAACGACCTGCTGATCTTTGTGACT  |
| Dpo3_62 |  | TCGTTAACCTTGTGCGGGGAGCCGCCAGTCACAAAGATCAGCAGG  |
| Dpo3_63 |  | CGCGACAAGGTTAACGAGCTCATCACGAAGATCAATTCTCTGTAC  |
| Dpo3_64 |  | AATCTTTACCTTCACATCGAGATTGTACAGAGAATTGATCTTCGT  |
| Dpo3_65 |  | CTCGATGTGAAGGTAAAGATTTTCTACAAGTCCCTGCTGGTGCTG  |
| Dpo3_66 |  | CTCGGACAGACCGGCGTAACGATTGTTGTCCAGCACCAGCAGGGA  |
| Dpo3_67 |  | GCCGGTCTGTCCGAGGGTGACAAGATCGACATCGCCCGCAAAGGT  |
| Dpo3_68 |  | TGCGAGTTCGCACAGGTTTCATGTCCTCCTCACCTTTGCGGGCGAT |
| Dpo3_69 |  | CTGTGCGAACTCGCACGCAACATTAAGCGCAAGATCATCGAGGAA  |
| Dpo3_70 |  | TTTCTTCACGTCCTTGGAGATCAGGATTTCTCGATGATCTTGCG   |
| Dpo3_71 |  | CTCCAAGGACGTGAAGAAAGCCATCAAGCTCGTGAAGAGCACGGT  |
| Dpo3_72 |  | TGTCAAACCTACCGCGACGCAGCTTGATTACCGTGCTTTCACGA   |
| Dpo3_73 |  | CGCGGTGAGTTTGACAATGAGGAGCTGATCACTTGGGCGAAAATC  |
| Dpo3_74 |  | TTGTTGTATTGTTTCAGGTCGCGCTCGATTTTCGCCAAGTGATC   |
| Dpo3_75 |  | GACCTGAACGAATACAACAACCAGCTCCCGTTTGTTACCGCCGCA  |
| Dpo3_76 |  | ATGAGGTAGCCAGACTGGATCGCCTTACGTGCGGCGGTAACAAAC  |
| Dpo3_77 |  | CCAGTCTGGCTACCTCATTTCCAAAGACAGCAAATCGGCTACGT   |
| Dpo3_78 |  | GTTGAGCGGACCGAGGCCTTTCACGATAACGTAGCCGATTTTGCT  |
| Dpo3_79 |  | CCTCGGTCCGCTCAACGACCGTGCGGAGCCGTTCTTCTCGTCAA   |
| Dpo3_80 |  | TATTCGATGTCGATGCGGTTTTTCTCCTTGACGAGGAAGAACGGC  |
| Dpo3_81 |  | CCGCATCGACATCGAATACTACGTGGACCAAATTTCCGCGAAAC   |
| Dpo3_82 |  | CGCCAGCGGTTTTCAGCAGTTTCAGGGTTTTCGCGGAAAATTTGGT |
| Dpo3_83 |  | TGAAACCGCTGGGCGTAAACGAAGAGTCTCTGAAGAAGACCAACA  |
| Dpo3_84 |  | CAAAGAGGTCCAGGATGTCGGTGATGTTGGTCTTCTTCAGAGAC   |
| Dpo3_85 |  | CATCCTGGACCTCTTTGGCGGTCTAAGAAGAAATGAGAATTCTGA  |
| Dpo3_86 |  | GACGGAGCTCGAATTCTCATTCTTCTTAGA                 |

## PCNA1

|          |  |                                            |
|----------|--|--------------------------------------------|
| PCNA1_01 |  | GAATTAATTCGGATCCATGATTTACT                 |
| PCNA1_02 |  | TGCGCTCGAAGCTCTTCAAGTAAATCATGGATCCGAATTA   |
| PCNA1_03 |  | AGAGCTTCGAGCGCAATATTCGTCTGATCAACATGAAGGT   |
| PCNA1_04 |  | CGCGCACATCATCGTAAACAACCTTCATGTTGATCAGACG   |
| PCNA1_05 |  | TTACGATGATGTGCGGTCCTGAAAGATATCATACAGGCG    |
| PCNA1_06 |  | CGTCCACAAGGCGCGCAAGCGCCTGTATGATATCTTTCAG   |
| PCNA1_07 |  | GCGCCTTGTGGACGAAGCGGTGCTGAAATTCAAACAGGAT   |
| PCNA1_08 |  | AACGCCACCAGTTCACCGAATCCTGTTTGAATTTACAGCA   |
| PCNA1_09 |  | TGGAAGTGGTGGCGTTAGATCGTGCCCATATTTCCCTTAT   |
| PCNA1_10 |  | CACGCGGCAGATTCACGCTGATAAGGGAAATATGGGCACG   |
| PCNA1_11 |  | GTGAATCTGCCGCGTAAATGTTCAAAGAGTACGACGTCA    |
| PCNA1_12 |  | ACCCGAAGTGAAGTTCATCGTTGACGTCGTAATCTTTGAA   |
| PCNA1_13 |  | GATGAGTTCAAGTTCGGGTTAACACCCAGTACCTGATGA    |
| PCNA1_14 |  | CGCTTCGCGACTTTCAGTATCTTCATCAGGTACTGGGTGT   |
| PCNA1_15 |  | TGAAAGTTCGCGAAGCGCAAAGAGGCCATTGAAATTCGCGAG |
| PCNA1_16 |  | GATCACGCTATCTGGGCTTTCGCTCGCAATTTCAATGGCC   |
| PCNA1_17 |  | GCCAGATAGCGTGATCATTAAACATTATAGGCAGCACTAA   |
| PCNA1_18 |  | CGAACGTTAAACTCGCGATTAGTGCTGCCTATAATGTTAA   |

|          |  |                                            |
|----------|--|--------------------------------------------|
| PCNA1_19 |  | CGCGAGTTTAAACGTTTCGTAATCTGGAAGTTAGCGAACAGG |
| PCNA1_20 |  | TGCAGGTTAATTTTCGGGAATCTCCTGTTTCGCTAACTTCCA |
| PCNA1_21 |  | TCCCGAAATTAACCTGCAATTTGACATTAGCGCGACCATT   |
| PCNA1_22 |  | GCGCTTTTGAAGCCATCGCTGCTAATGGTCGCGCTAATGT   |
| PCNA1_23 |  | GATGGCTTCAAAAGCGCGATAAGCGAAGTAAGCACCGTGA   |
| PCNA1_24 |  | GCCCTCCACGACCACATTATCGGTACCGGTGCTTACTTCCG  |
| PCNA1_25 |  | GTGGTCGTGGAGGGCCATGAGGATCGTATCCTGATTAAG    |
| PCNA1_26 |  | CTTCCGACTCCCCCTCCGCTTTAATCAGGATACGATCCTC   |
| PCNA1_27 |  | GAGGGGGAGTCGGAAGTGGAGGTGGAATTTAGCAAAGATA   |
| PCNA1_28 |  | GGTCCTGCAGACCCCCGGTATCTTTGCTAAATTCCACCTC   |
| PCNA1_29 |  | GGGGTCTGCAGGACCTTGAGTTCTCCAAAGAGAGCAAAAA   |
| PCNA1_30 |  | GTATTCGGCGCTATAGGAATTTTTGCTCTCTTTGGAGAAC   |
| PCNA1_31 |  | TTCTATAGCGCCGAATACCTGGACGATGTACTIONGAGCCTG |
| PCNA1_32 |  | TGACATAATCCGACAGCTTGGTCAGGCTCAGTACATCGTC   |
| PCNA1_33 |  | AAGCTGTTCGATTATGTCAAGATAAGCTTTGGCAATCAGA   |
| PCNA1_34 |  | GAAAAACAGCTGCAGAGGTTTCTGATTGCCAAAGCTTATC   |
| PCNA1_35 |  | CCTCTGCAGCTGTTTTTCAATATGGAAGGAGGAGGGAAGG   |
| PCNA1_36 |  | TTTGGGCGCTAACAGATAGGTCACCTTCCCTCCTCCTTCC   |
| PCNA1_37 |  | TATCTGTTAGCGCCCAAAGTGCATCACCACCATCATCATT   |
| PCNA1_38 |  | GACGGAGCTCGAATTCTCAATGATGATGGTGGTGATG      |

## PCNA2

|          |  |                                            |
|----------|--|--------------------------------------------|
| PCNA2_01 |  | GAATTAATTCGGATCCATGATGAAAGCGAAAGTTATC      |
| PCNA2_02 |  | AGAGAAAGAAACCCGCGTCGATAACTTTTCGCTTTCATCATG |
| PCNA2_03 |  | GACGCGGTTTCTTTCTTTACATTCTGCGTACTGTTGGTG    |
| PCNA2_04 |  | GAAGTTGGCCTCGCTCAGGAAGTCACCAACAGTACGCAGA   |
| PCNA2_05 |  | GAGCGAGGCCAACTTCATCGTTACCAAAGAAGGTATCCGT   |
| PCNA2_06 |  | GACGGGTCGATACCAGAAACACGGATACCTTCTTTGGTAA   |
| PCNA2_07 |  | TCTGGTATCGACCCGTCCCGTGTAGTTTTCTCGACATCT    |
| PCNA2_08 |  | GAAGTAAGAAGACGGCAGAAAGATGTCGAGGAAAACCTACA  |
| PCNA2_09 |  | TCTGCCGTCTTCTTACTTTCGAGGGTTTCGAGGTGTCTCAA  |
| PCNA2_10 |  | TGAAACCGATGATTTCTTTTTCTTGAGACACCTCGAAACC   |
| PCNA2_11 |  | GAAAAAGAAATCATCGGTTTCAAGCTGGAAGACGTAAACG   |
| PCNA2_12 |  | TTGAGAACACGTTTTCAGGATGTCGTTTACGTCTTCCAGCT  |
| PCNA2_13 |  | TCCTGAAACGTGTTCTCAAGGACGACACGCTGATCCTGTC   |
| PCNA2_14 |  | GGGTCAGTTTATGATTCGTTAGAAGACAGGATCAGCGTGTC  |
| PCNA2_15 |  | CTAACGAATCTAAACTGACCCTGACCTTCGATGGTGAATT   |
| PCNA2_16 |  | GGCAGTTCGAAAGAACGAGTAAATTCACCATCGAAGGTCA   |
| PCNA2_17 |  | TCGTTCTTTCGAACTGCCTCTGATCCAGGTTGAATCTACC   |
| PCNA2_18 |  | AGATTAACAGACGGAGGCTGGGTAGATTCAACCTGGATCA   |
| PCNA2_19 |  | GCCTCCGTCTGTTAATCTGGAGTTCCCGTTCAAAGCGCAG   |
| PCNA2_20 |  | GTCCGCGAACGTGATGGTCAGGAGCTGCGCTTTGAACGGG   |
| PCNA2_21 |  | CATCACGTTTCGCGGACATCATCGACGAACTCTCCGACCTG  |

|          |  |                                          |
|----------|--|------------------------------------------|
| PCNA2_22 |  | CTGTGGATGTTGAGGACTTCACCCAGGTCGGAGAGTTCGT |
| PCNA2_23 |  | AAGTCCTCAACATCCACAGCAAAGAGAACAAGCTGTACTT |
| PCNA2_24 |  | GAGATCACCAATCACCTCAAAGTACAGCTTGTCTCTTTG  |
| PCNA2_25 |  | TGAGGTGATTGGTGATCTCTCTACTGCCAAAGTTGAACTG |
| PCNA2_26 |  | AGGGTACCGTTGTCGGTAGACAGTTCAACTTTGGCAGTAG |
| PCNA2_27 |  | CCGACAACGGTACCCTGCTCGAGGCTTCCGGTGCTGACGT |
| PCNA2_28 |  | GTATTCCATACCGTAGCTAGAAGAAACGTCAGCACCGGAA |
| PCNA2_29 |  | TCTAGCTACGGTATGGAATACGTTGCGAACACGACCAAAA |
| PCNA2_30 |  | CATAGAGTCAGACGCACGACGCATTTTGGTCGTGTTCGCA |
| PCNA2_31 |  | CGTGCGTCTGACTCTATGGAACCTATTTCCGGTCTCAGA  |
| PCNA2_32 |  | AAACGCAGCTTCAGTGGGATCTGAGAACCGAAATAGAGTT |
| PCNA2_33 |  | CCACTGAAGCTGCGTTTTAAGCTGCCGCAGGAAGGTTATG |
| PCNA2_34 |  | ACGCGGTGCAATGTAGAAATCGCCATAACCTTCTGCGGC  |
| PCNA2_35 |  | CTACATTGCACCGCGTGCGGACCACCACCATCATCACCAC |
| PCNA2_36 |  | GACGGAGCTCGAATTCTCAGTGGTGATGATGGTGGTG    |

### PCNA3

|          |  |                                            |
|----------|--|--------------------------------------------|
| PCNA3_01 |  | GAATTAATTCGGATCCATGTTCA                    |
| PCNA3_02 |  | GCGTTCGGGTAAACGATTTTGAACATGGATCCGAATTAATT  |
| PCNA3_03 |  | ATCGTTTACCCGAACGCGAAGGACTTCTTCAGCTTTATCAA  |
| PCNA3_04 |  | CGGTCACGTTGGTAATAGAGTTGATAAAGCTGAAGAAGTCC  |
| PCNA3_05 |  | TCTATTACCAACGTGACCGACAGCATTATCCTGAACTTTAC  |
| PCNA3_06 |  | AGAGAAGATACCGTCCCGTAAAGTTCAGGATAATGCTGT    |
| PCNA3_07 |  | GGAGGACGGTATCTTCTCTCGTCACCTCACCGAAGACAAAG  |
| PCNA3_08 |  | GATGCGCATGATCGCCATCAGTACTTTGTCTTCGGTGAGGT  |
| PCNA3_09 |  | GGCGATCATGCGCATCCCGAAAGACGTTCTGTCTGAATACT  |
| PCNA3_10 |  | AGAGGTCGGAGAGTCGATAGAGTATTCAGACAGAACGTCTT  |
| PCNA3_11 |  | TCGACTCTCCGACCTCTGTTAAGCTGGACGTTTCTAGCGTT  |
| PCNA3_12 |  | GACGCTTTAGACAGGATCTTTTTAACGCTAGAAACGTCCAG  |
| PCNA3_13 |  | AGATCCTGTCTAAAGCGTCTTCTAAAAAAGCGACCATCGAA  |
| PCNA3_14 |  | ACCAGAGTCCGTTTCAGTCAGTTCGATGGTCGCTTTTTTAG  |
| PCNA3_15 |  | ACTGAAACGGACTCTGGTCTGAAGATCATCATCCGTGACGA  |
| PCNA3_16 |  | TGGTAGATTTTCGCACCAGACTTTTCGTCACGGATGATGATC |
| PCNA3_17 |  | CTGGTGCGAAATCTACCATCTACATCAAAGCGGAAAAAGGT  |
| PCNA3_18 |  | GTTTCGGTCAGCTGTTCAACCTGACCTTTTTCCGCTTTGATG |
| PCNA3_19 |  | TGAACAGCTGACCGAACCGAAAGTTAACCTGGCAGTAAATT  |
| PCNA3_20 |  | AACAGATTCGTCGGTGGTGAAATTTACTGCCAGGTTAACTT  |
| PCNA3_21 |  | CCACCGACGAATCTGTTCTGAACGTTATCGCTGCGGATGTC  |
| PCNA3_22 |  | ACGCATTTCTTCACCAACGAGGGTGACATCCGCAGCGATAA  |
| PCNA3_23 |  | GTTGGTGAAGAAATGCGTATCTCTACCGAGGAGGATAAAAT  |
| PCNA3_24 |  | CCTCACCTGCCTCGATCTTGATTTTATCCTCCTCGGTAGAG  |
| PCNA3_25 |  | ATCGAGGCAGGTGAGGAGGGTAAGCGTTATGTTGCGTTTCT  |
| PCNA3_26 |  | CTTTGAGCGGCTTGTCCTTCATCAGAAACGCAACATAACGC  |
| PCNA3_27 |  | GACAAGCCGCTCAAAGAGCTGTCCATTGACACCTCTGCTAG  |
| PCNA3_28 |  | CATTTCCGCGCTGTAGGAAGAGCTAGCAGAGGTGTCAATGG  |
| PCNA3_29 |  | CCTACAGCGCGGAAATGTTTAAAGACGCGGTTAAAGGTCTC  |





|         |  |                                           |
|---------|--|-------------------------------------------|
| RadA_37 |  | GCACGTCCGGATATGTTCTACGGTGACCCGACCGTTGCGG  |
| RadA_38 |  | AACGTGGTACAGGGTGTGACCGCCAACCGCAACGGTCGGG  |
| RadA_39 |  | ACACCCTGTACCACGTTCCGGGTATCCGTATCCAGCTGAA  |
| RadA_40 |  | CGACGGTTACCACGAGATTTCTTCAGCTGGATACGGATAC  |
| RadA_41 |  | CTCGTGGTAACCGTCGTATCGCGCGTGTTGTGCGATGCGCC |
| RadA_42 |  | ACAACCTCGCCTTCTGGGAGGTGCGGCGCATCGACAACAC  |
| RadA_43 |  | CCAGAAGGCCGAAGTTGTTTTTTCGCTGACCGAGGAAGGTA |
| RadA_44 |  | ATGGTGCTCTTCCGCGTCACGAATACCTTCCTCGGTCAGC  |
| RadA_45 |  | CGCGGAAGAGCACCATCATCACCACCACTGAGAATTTCGAG |
| RadA_46 |  | GACGGAGCTCGAATTCTCAGTGGTGG                |

Table S2. Gene information and gene-specific primers used in RT-PCR. F: forward; R: reverse.

| Gene         | Sso No. | Location             | Length | Amplification region | Fragment length | Primer sequence (5'–3')                                    |
|--------------|---------|----------------------|--------|----------------------|-----------------|------------------------------------------------------------|
| Dpo1         | SSO0552 | 486104<br>–488752    | 2649   | 1856–<br>2386        | 531             | F:CGTTATATGCGCCAGC<br>TGTA<br>R:CGTGTGGGGAGTGT<br>CTTT     |
| Dpo2         | SSO1459 | c1317435<br>–1315750 | 1686   | 573–<br>1103         | 531             | F: TGACCATTTCGTATGC<br>CTCA<br>R: CAGTTTCGGCAAAGGG<br>ATTA |
| Dpo3         | SSO0081 | c66328<br>–64034     | 2295   | 1575–<br>2040        | 466             | F: TCCAGGGAAGGAGATC<br>TGAA<br>R: CAAACATCCACGCCTA<br>CTCA |
| Dpo4         | SSO2448 | c2219975<br>–2221033 | 1059   | 189–<br>602          | 414             | F: CCGTTACTGCGACTAC<br>GTGA<br>R: TTGCTGCTGATATGGC<br>AAAG |
| PCNA1        | SSO0405 | 355009<br>–355788    | 780    | 285–<br>746          | 462             | F: AGCCAAGAGAAAAGAG<br>GCAAT<br>R: CCCCTCCCTCCATAT<br>TAAA |
| PCNA2        | SSO1047 | 905678<br>–906418    | 741    | 113–<br>612          | 500             | F: GCGGAATTGATCCTTC<br>AAGA<br>R: ATTCGCAACGTATTCC<br>ATCC |
| PCNA3        | SSO0397 | 348688<br>–349437    | 750    | 318–<br>748          | 431             | F: GAGTGGGGCGAAAAGT<br>ACAA<br>R: ATAACCTTGGCGCTAT<br>CCAA |
| RFC<br>small | SSO0768 | 653092<br>–654084    | 993    | 147–<br>639          | 493             | F: ACCGGGTACCGGAAAA<br>ACTA<br>R: ATAAGCTGAGGCGGCT<br>TGTA |
| RFC<br>large | SSO0769 | 654081<br>–655298    | 1218   | 55–<br>634           | 580             | F: CAAGATGATGCGAAAA<br>AGCA<br>R: CGTATCCTTCCCAAT<br>TCCT  |
| SSB          | SSO2364 | 2157622<br>–2158068  | 447    | 68–<br>736           | 309             | F: AAGCAAGCGAAGCAAG<br>ACA<br>R: GGAATCCTCTTCTCC<br>TCCA   |
| RadA         | SSO0250 | c216135<br>–217109   | 975    | 145–<br>683          | 539             | F: GTAGCAGCTGGCATT<br>CATT<br>R: ACGGCCAGATTTTCTC<br>TTCC  |

|            |        |                  |     |             |     |                                                            |
|------------|--------|------------------|-----|-------------|-----|------------------------------------------------------------|
| 7S<br>rRNA | SSOr01 | C49815-<br>50180 | 366 | 153-<br>364 | 212 | F:TCCGGAGGGAGAGAAA<br>GTACC<br>R:GCTAGGCGACCTCGGC<br>ACTAC |
|------------|--------|------------------|-----|-------------|-----|------------------------------------------------------------|

**FIGURE S1. RT-PCR analyses of Dpo1, Dpo2, Dpo3, and Dpo4 (agarose electrophoresis image).** RT-PCR was performed as described in the Experimental Procedures section. Lanes 1, 13, 36, and 48 included molecular markers; lanes 2 to 11 were time points for 7S rRNA and Dpo1; lanes 14 to 23 were time points for 7S rRNA and Dpo2 RNA; lanes 25 to 34 were time points for 7S rRNA and Dpo3 RNA; lanes 37 to 46 were time points for 7S rRNA and Dpo4 RNA; lanes 12, 24, 35, 47 were controls with no template.

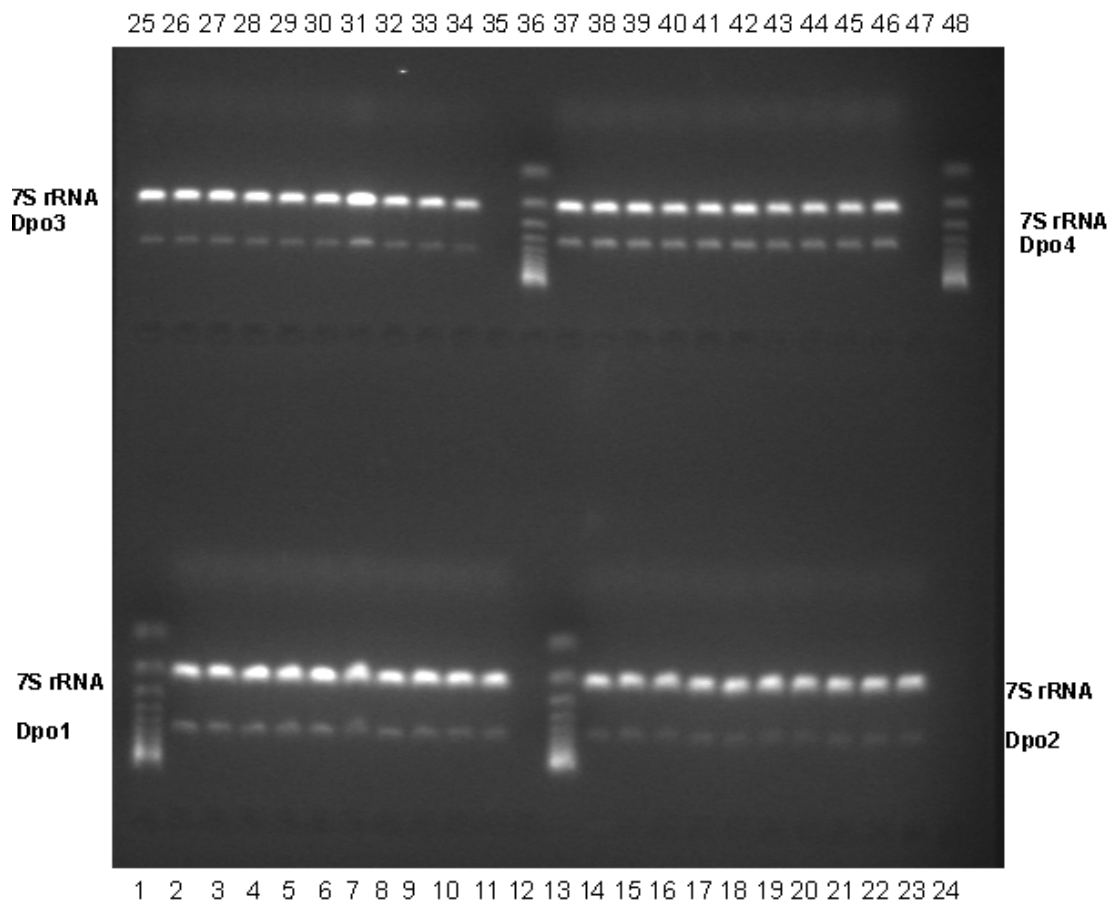

FIGURE S2. **Analysis of antibody cross-reactivity using immunoblotting.** See body of text for procedures. In each case 1.0  $\mu\text{g}$  of the indicated protein was used in each lane and the antibody (labeled with the rabbit number, #) was used at a dilution of 1/400. The arrow in each part indicates the migration position of the antigen used to raise the antibody. These antisera were used in quantifying the amounts of the individual proteins during the growth of *Sulfolobus solfataricus*. *A*, anti-Dpo1; *B*, anti-Dpo2; *C*, anti-Dpo3; *D*, anti-Dpo4; *E*, anti-PCNA 1; *F*, anti-PCNA 2; *G*, anti-RFC (1 and 2—high and low  $M_r$  subunits); *H*, anti-SSB.

**A**

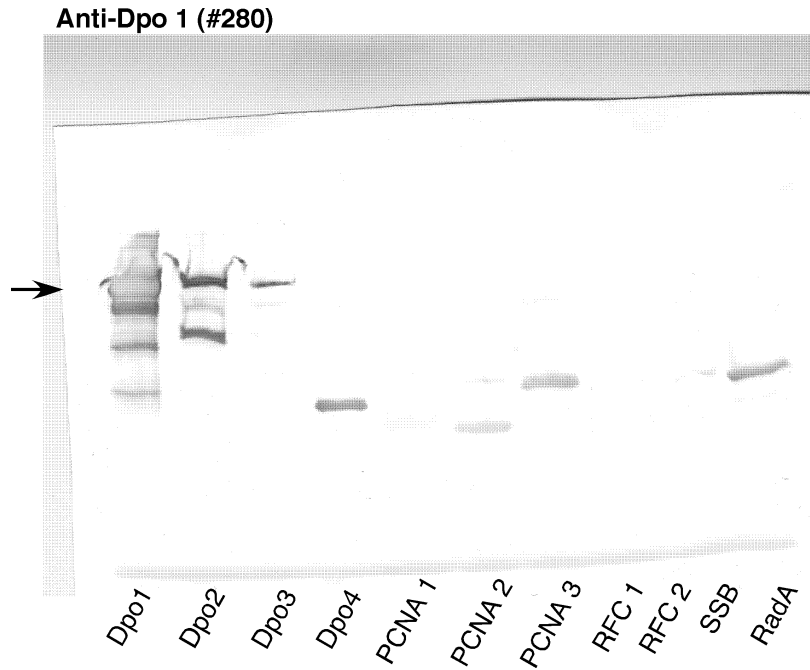

**B**

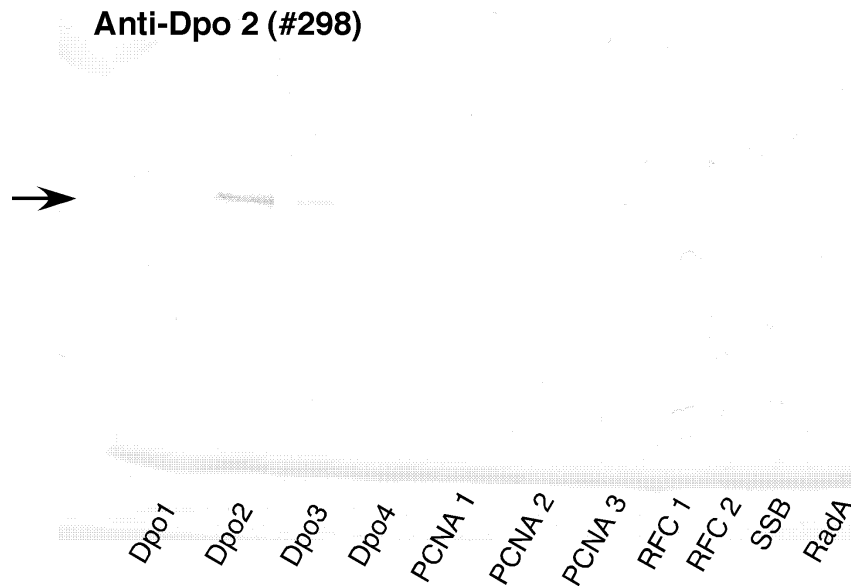

**C**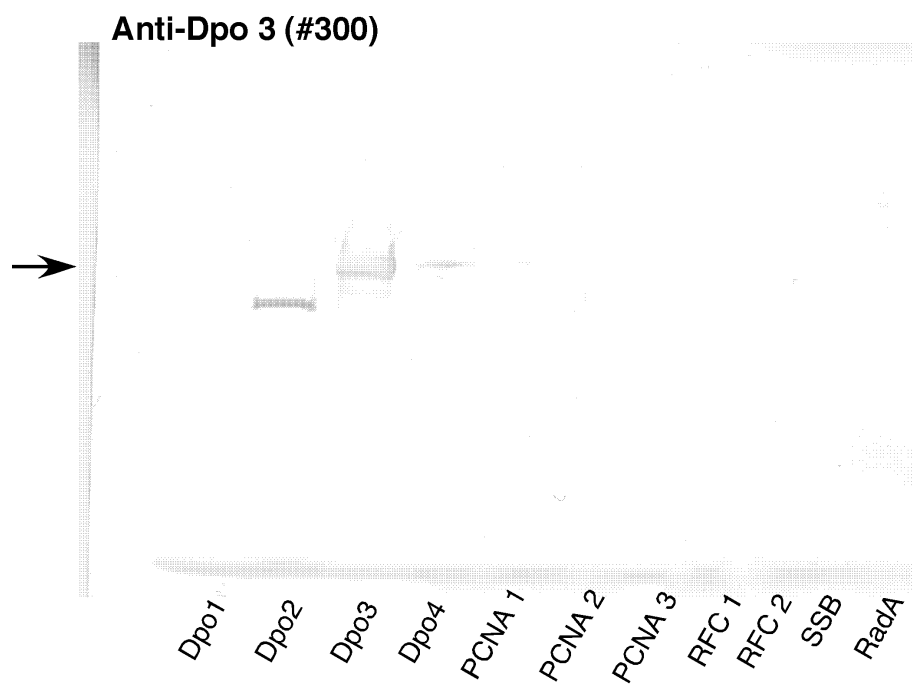**D**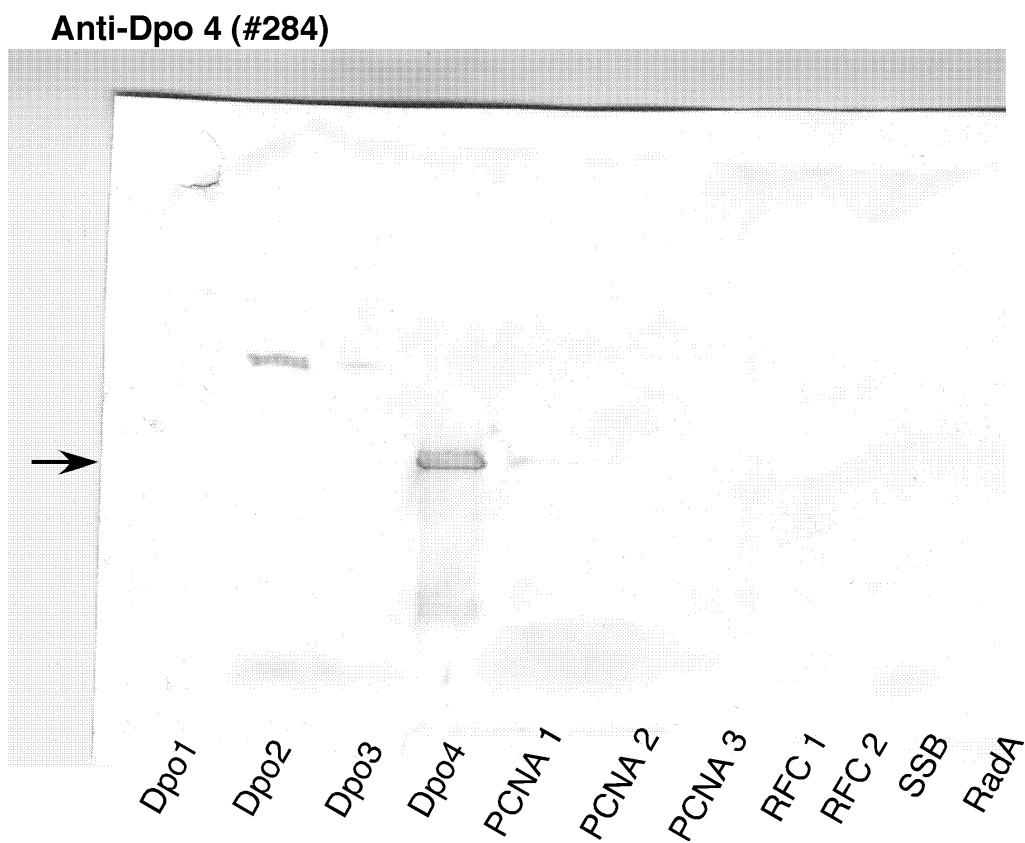

**E**

**Anti-PCNA 1 (#286)**

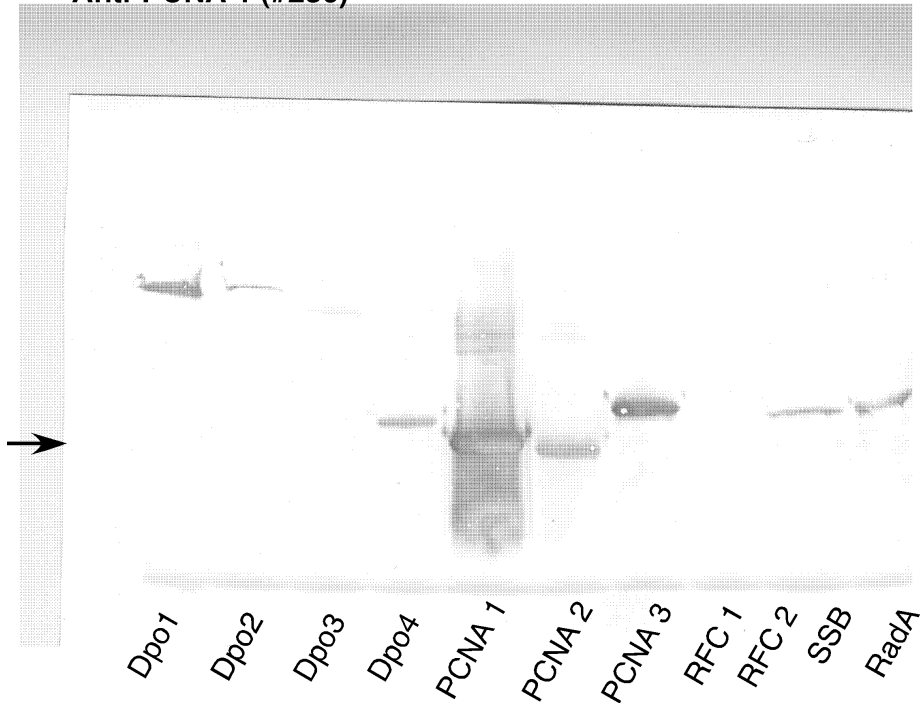

**F**

**Anti-PCNA 2 (#289)**

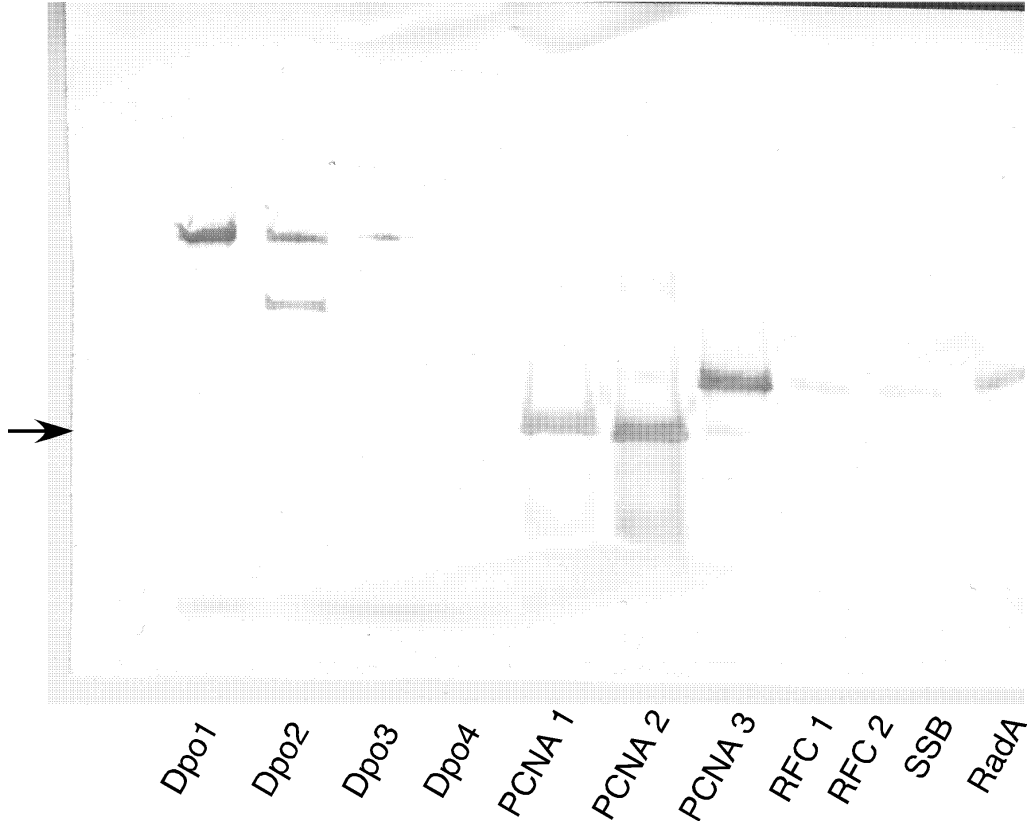



**G**

**Anti-RFC (#302)**

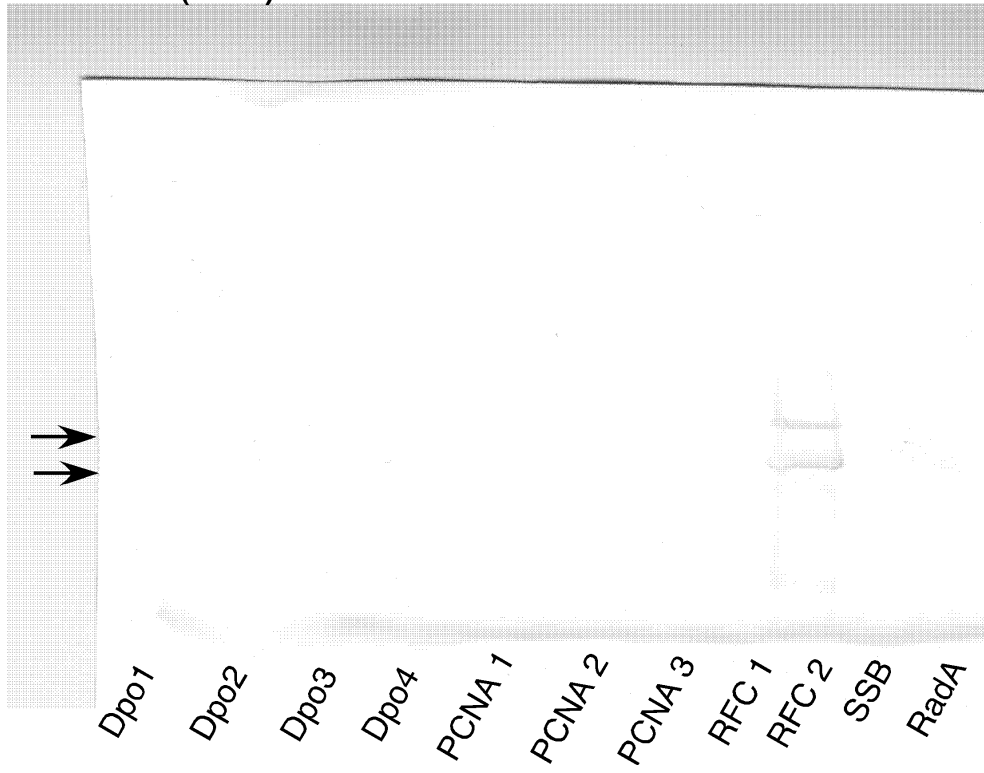

**H**

**Anti-SSB (#304)**

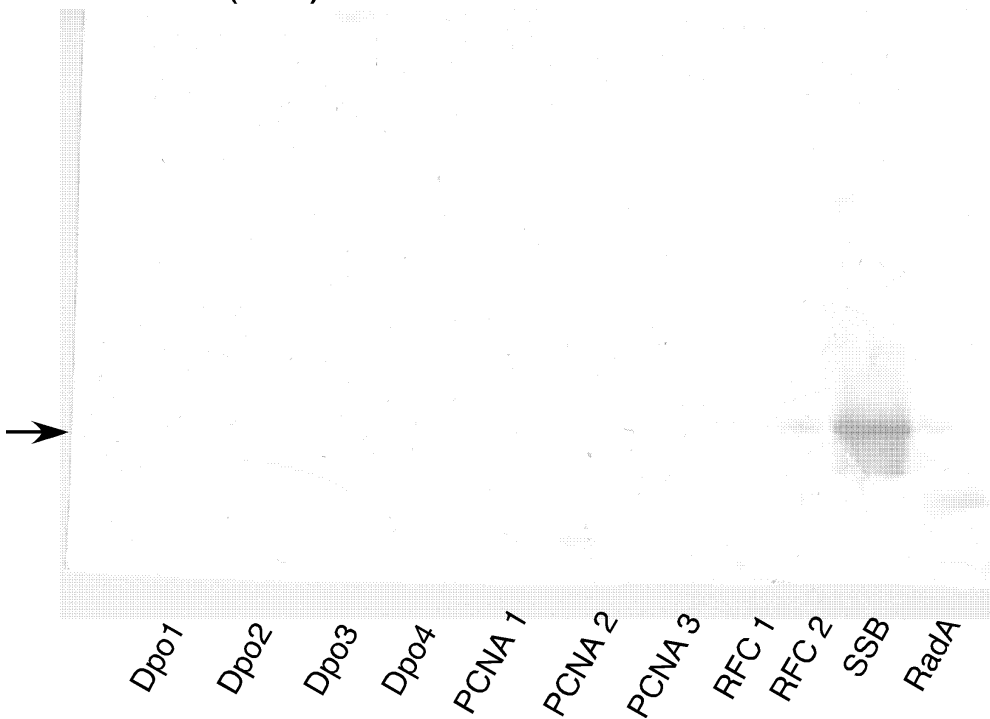

**FIGURE S3. Representative quantitative immunoblots (Dpo1, Dpo3, PCNA1, and RFC).** Quantitative immunoblot analyses were performed as described in the Experimental Procedures section. Lanes 1-5 included the indicated purified protein antigens (2-fold serial dilution from 6.4 ng to 400 pg) and lanes 6-14 contained protein extracts (5  $\mu$ g protein) at individual time points.

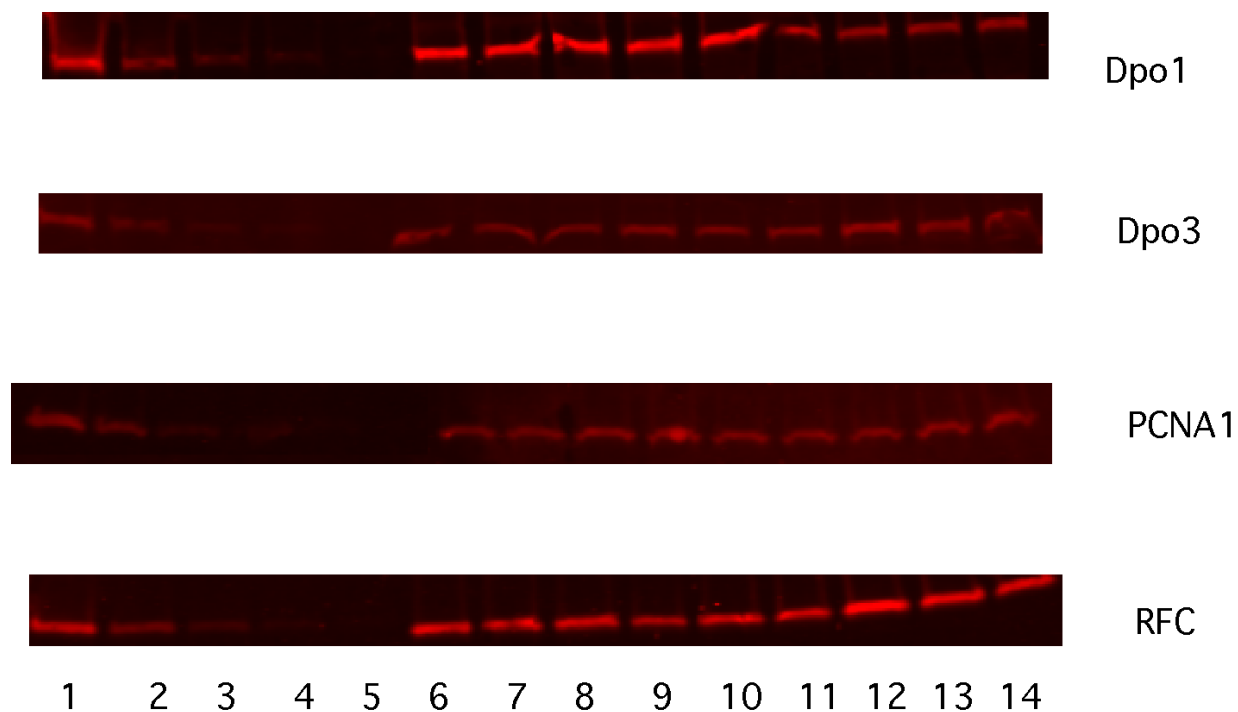

Supplement: supp_M111.258038_jbc.M111.258038-1.pdf [file supp_M111.258038_jbc.M111.258038-1.pdf]
